# Supplementary material for: Development of a novel nitrite electrochemical sensor by stepwise in situ formation of palladium and reduced graphene oxide nanocomposites
Source: Royal Society of Chemistry journal article supplement (doi:10.1039/c5ra02661j), 2015-01-01
Supplement: c5ra02661j1.pdf [file c5ra02661j1.pdf]

# Development of a Novel Nitrite Electrochemical Sensor by Stepwise in situ Formation of Palladium and Reduced Graphene Oxide Nanocomposites

Li Fu<sup>a</sup>, Shuhong Yu<sup>b</sup>, Lachlan Thompson<sup>a</sup> and Aimin Yu<sup>a,\*</sup>

<sup>a</sup> Department of Chemistry and Biotechnology, Faculty of Science, Engineering and Technology, Swinburne University of Technology, Hawthorn VIC 3122, Australia

<sup>b</sup> Division of Nanomaterials and Chemistry, Hefei National Laboratory for Physical Sciences at Microscale, Department of Chemistry, University of Science and Technology of China, Hefei, Anhui 230026, P. R. China

## Supplementary Materials

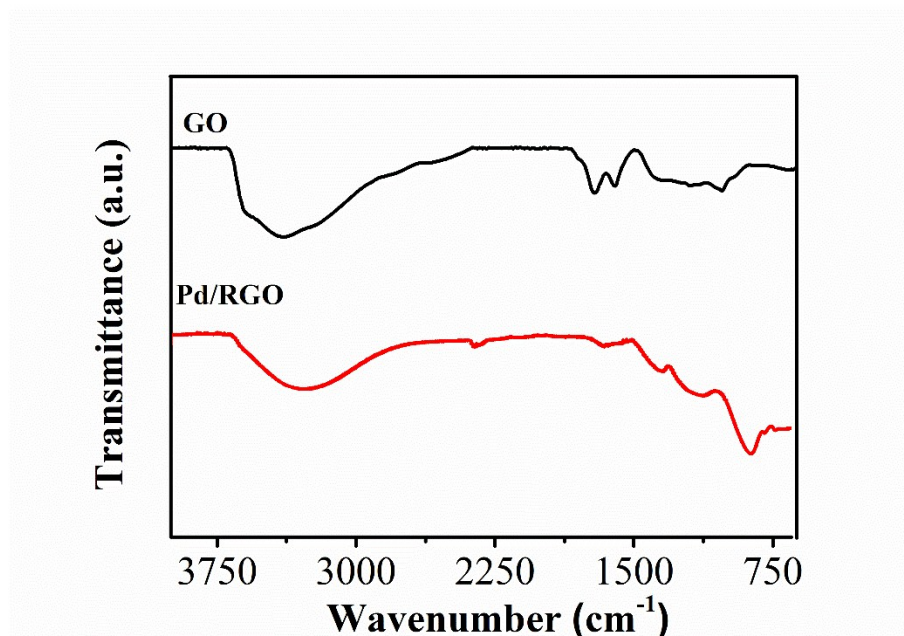

**Figure S1.** FTIR spectra of GO and Pd/RGO composite.

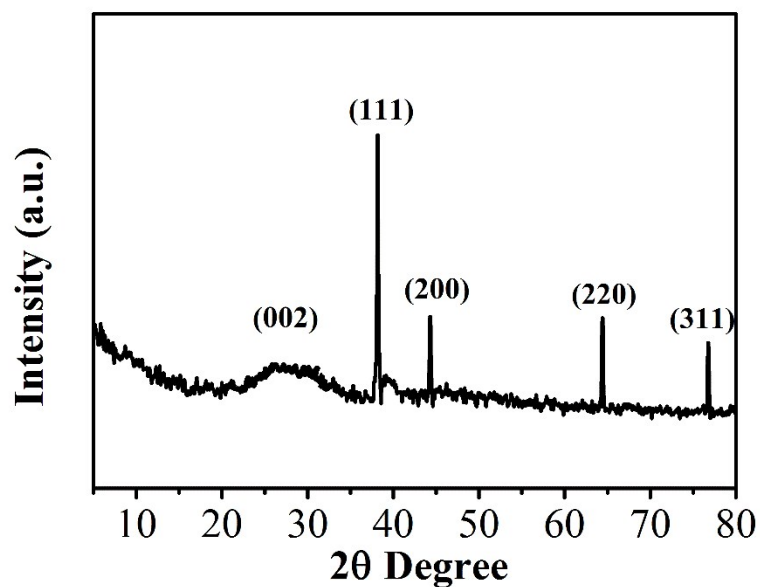

**Figure S2.** XRD pattern for Pd/RGO composites.

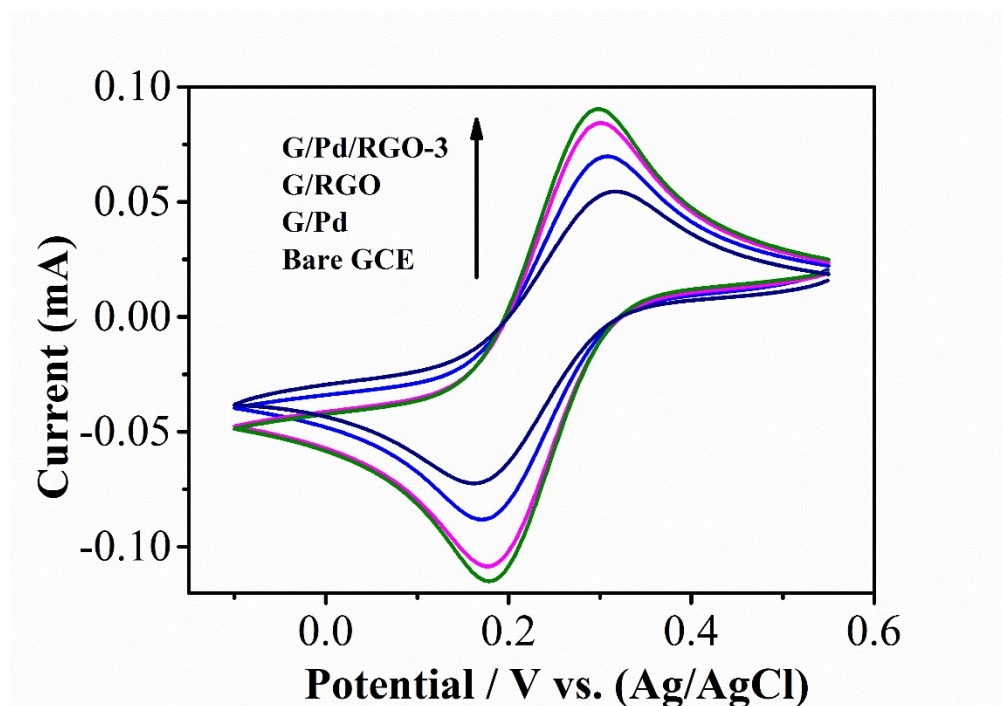

**Figure S3.** Cyclic voltammograms of bare, G/Pd, G/RGO and G/Pd/RGO-3 in 0.1 M KCl containing 1 mM  $[\text{Fe}(\text{CN})_6]^{4-}$ . Scan rate: 20 mV/s.

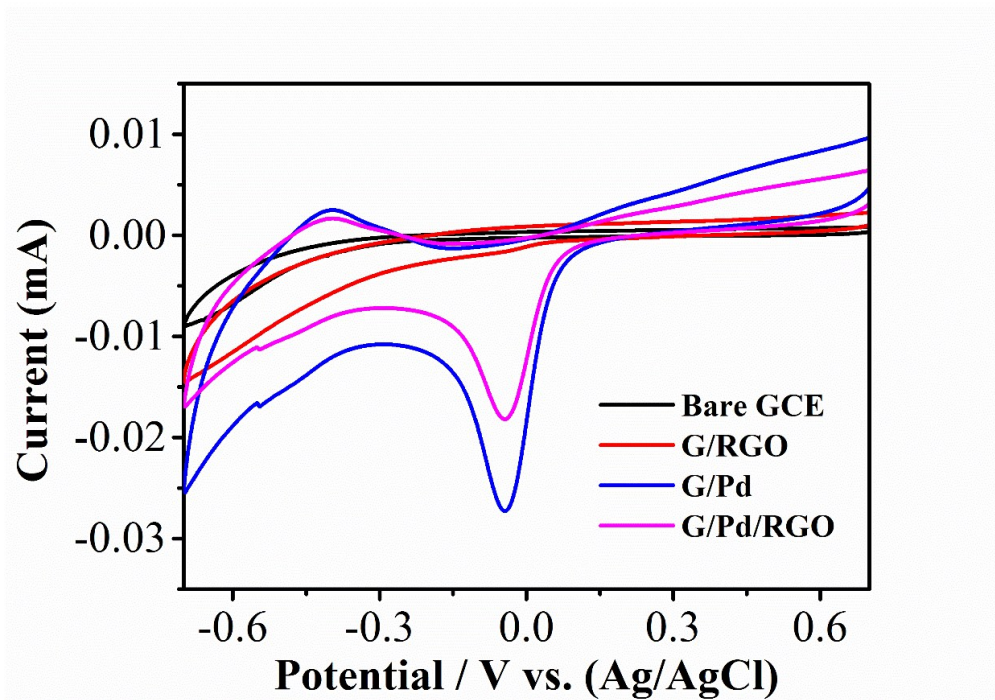

**Figure S4.** Cyclic voltammograms of bare, G/Pd, G/RGO and G/Pd/RGO-3 in 0.1 M PBS (pH = 7.0). Scan rate: 50 mV/s.

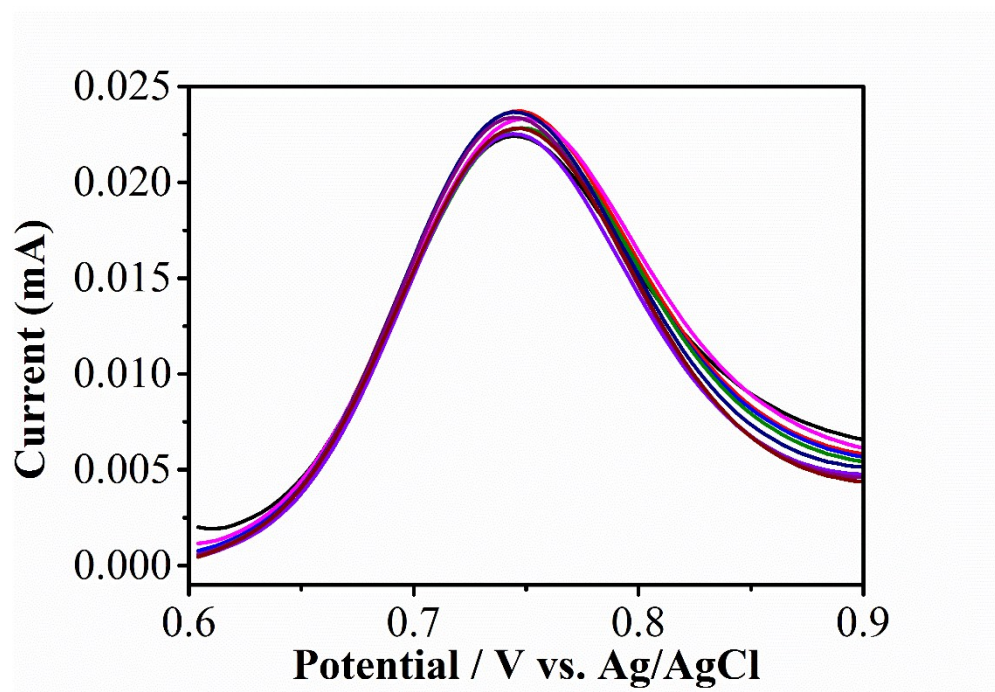

**Figure S5.** Differential pulse voltammograms at the G/Pd/RGO-3 for eight successive repetitive measurement of 1 mM nitrite.



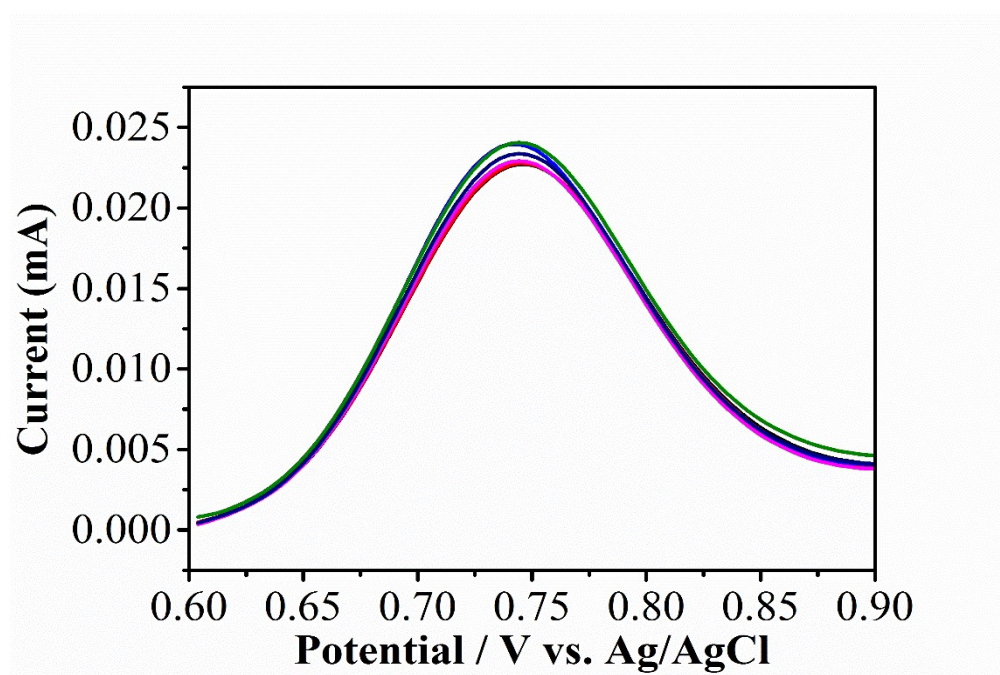

**Figure S6.** Differential pulse voltammograms of six G/Pd/RGO-3 electrodes for detecting 1 mM nitrite.

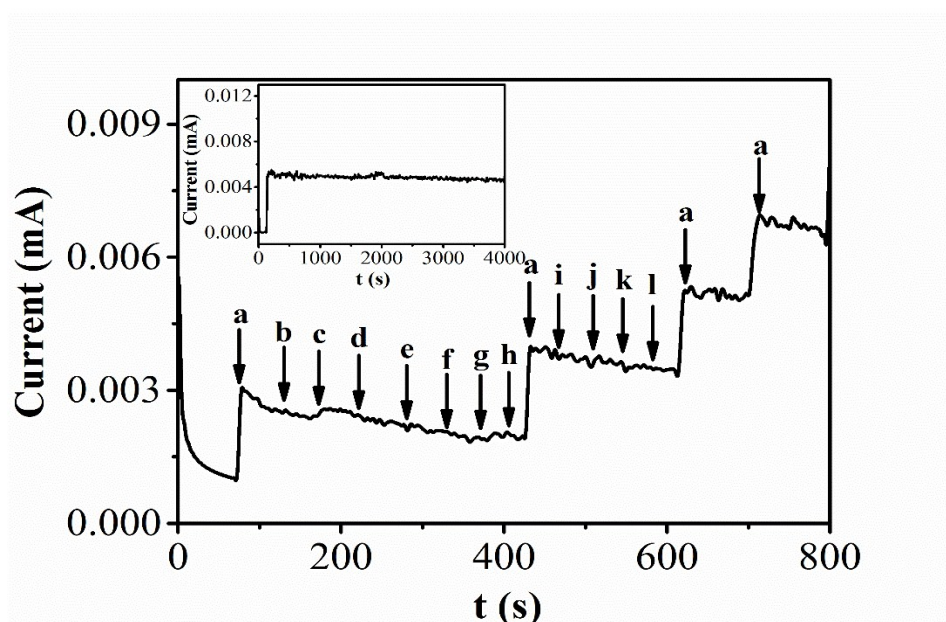

**Figure S7.** *I-t* curve recorded on the G/Pd/RGO-3 in the PBS by addition of 0.2 mM of (a) nitrite, 2 mM of (b)  $K^+$ , (c)  $Na^+$ , (d)  $Zn^{2+}$ , (e)  $SO_4^{2-}$ , (f)  $CO_3^{2-}$ , (g)  $NH_4^+$ , (h)  $HPO_4^{2-}$ , 1 mM of (i) glucose, (j) dopamine, (k) uric acid and (l) ascorbic acid at 0.8 V. Inset: *I-t* curve recorded on the G/Pd/RGO-3 in the PBS by addition of 0.4 mM of nitrite at 0.8 V for 4000 s.

**Table S1** Performance comparison of the proposed G/Pd/RGO-3 electrode and electrodes reported by previous reports.

| Electrode                  | Method | Potential (V) | LOD ( $\mu$ M) | Linear range( $\mu$ M) | Reference |
|----------------------------|--------|---------------|----------------|------------------------|-----------|
| GC/MC                      | DPV    | 0.808         | 0.1            | 0.5-100                | [1]       |
| (p-NiTAPc)<br>modified GCE | CV     | 0.86          | 0.9            | 2.5-1000               | [2]       |
| TiO <sub>2</sub> /ND       | DPV    | 0.73          | 0.55           | 50-1000                | [3]       |
| Thionine/ACNTs             | DPV    | 0.8           | 1.12           | 3-500                  | [4]       |
| GR/PPy/CS/GCE              | I-t    | 0.9           | 0.1            | 0.5-722                | [5]       |
| GNPs/MWCPE                 | SWV    | 0.9           | 0.01           | 0.05-250               | [6]       |
| G/Pd/RGO                   | DPV    | 0.75          | 0.23           | 1-1000                 | This work |

GC = Glassy carbon; MC = chitosan-carboxylated multiwall carbon nanotube; ND = Nanodiamond; ACNTs = Aligned carbon nanotubes; GR/PPy/CS = graphene/polypyrrole/chitosan; GNPs/MWCPE = gold nanoparticles/multi-walled carbon nanotube/carbon paste electrode

## References

- [1] L. Jiang, R. Wang, X. Li, L. Jiang, G. Lu, Electrochemical oxidation behavior of nitrite on a chitosan-carboxylated multiwall carbon nanotube modified electrode, *Electrochemistry Communications*, 7 (2005) 597-601.
- [2] Z.-H. Wen, T.-F. Kang, Determination of nitrite using sensors based on nickel phthalocyanine polymer modified electrodes, *Talanta*, 62 (2004) 351-355.
- [3] L.Y. Bian, Y.H. Wang, J. Lu, J.B. Zang, Synthesis and electrochemical properties of TiO<sub>2</sub>/nanodiamond nanocomposite, *Diamond and Related Materials*, 19 (2010) 1178-1182.
- [4] K. Zhao, H. Song, S. Zhuang, L. Dai, P. He, Y. Fang, Determination of nitrite with the electrocatalytic property to the oxidation of nitrite on thionine modified aligned carbon nanotubes, *Electrochemistry Communications*, 9 (2007) 65-70.
- [5] D. Ye, L. Luo, Y. Ding, Q. Chen, X. Liu, A novel nitrite sensor based on graphene/polypyrrole/chitosan nanocomposite modified glassy carbon electrode, *The Analyst*, 136 (2011) 4563-4569.
- [6] A. Afkhami, F. Soltani-Felehgari, T. Madrakian, H. Ghaedi, Surface decoration of multi-walled carbon nanotubes modified carbon paste electrode with gold nanoparticles for electro-oxidation and sensitive determination of nitrite, *Biosensors & bioelectronics*, 51 (2014) 379-385.
